# Supplementary material
Source: publisher figshare collection journal article supplement (https://sage.figshare.com/ndownloader/files/17090117)
Supplement: Supplementary file 1 [file 17090117]

**Supplementary Table 1** Adjusted analysis with propensity score for postoperative outcomes and the number of surgeons involved

|                                | OR (95% CI)*                  | <i>P</i> value |
|--------------------------------|-------------------------------|----------------|
| Reoperations                   | 0.4 (0.2 – 0.9)               | 0.038          |
| Colorectal anastomotic leakage | 0.6 (0.2 – 1.3)               | 0.204          |
| Mortality                      | 0.8 (0.2 – 3.7)               | 0.807          |
|                                | Linear regression coefficient |                |
| Hospital stay                  | -0.8 (-2.9 – 1.3)             | 0.446          |

\*Odds ratio and 95% confidence interval
